# Supplementary material for: Composition and global distribution of the mosquito virome - A comprehensive database of insect-specific viruses
Source: PubMed Central journal article supplement (PMC9929601; doi:10.1016/j.onehlt.2023.100490), 2023-01-20
Supplement: mmc1.pdf [file mmc1.pdf]

**Supplementary file 1.** Final selection of 175 articles used for the analyses and their references

| <b>Study</b>                                       | <b>Reference</b> |
|----------------------------------------------------|------------------|
| Abilio_BMCMicrobiol_2020                           | [1]              |
| Ajamma_PLoSNegITropDis_2018                        | [2]              |
| Ali_Nature_2021                                    | [3]              |
| Atoni_Viruses_2018                                 | [4]              |
| Auguste_JGenViroI_2014                             | [5]              |
| Auguste_Virology_2021                              | [6]              |
| Bahk_KoreanJParasitol_2020                         | [7]              |
| Baidaliuk_VirusEvolution_2020                      | [8]              |
| Batson_eLife_2021                                  | [9]              |
| Belda_BMCGenomics_2019                             | [10]             |
| Bennouna_Virology_2019                             | [11]             |
| Bigot_VirusEvol_2018                               | [12]             |
| Birnberg_Viruses_2020                              | [13]             |
| Blitvich_JMedEntomol_2010                          | [14]             |
| Bolling_AmJTropMedHyg_2011                         | [15]             |
| Carissimo_PLoSOne_2016                             | [16]             |
| Carrera_AmJTropMedHyg_2015                         | [17]             |
| Chandler_frontiersinMicrobiology_2015              | [18]             |
| Chandler_Virology_2014                             | [19]             |
| Charles_JournalofGeneralVirology_2018              | [20]             |
| Chatterjee_ViroIJ_2021                             | [21]             |
| Chen_CompImmunoIMicrobiolInfectDis_2013            | [22]             |
| Chiuya_PLoSOne_2021                                | [23]             |
| Cholleti_PLOSONE_2016                              | [24]             |
| Cholleti_ViroIJ_2018                               | [25]             |
| Coffey_Virology_2014                               | [26]             |
| Contreras-Gutierrez_Virology_2017                  | [27]             |
| Cook_PLOSONE_2013                                  | [28]             |
| Crabtree_ArchViroI_2009                            | [29]             |
| Cunha_ActaTropica_2020                             | [30]             |
| Cunha_MicrobiolResourAnnounc_2020                  | [31]             |
| daSilva_VirusResearch_2021                         | [32]             |
| daSilvaFerreira_InfectionGeneticsandEvolution_2020 | [33]             |
| daSilvaNeves_VirusResearch_2021                    | [34]             |
| daSilvaRibeiro_VirologyJournal_2022                | [35]             |
| Datta_Intervirolgy_2015                            | [36]             |
| deAraujo_ArchViroI_2012                            | [37]             |
| deOliveira_SciRep_2021                             | [38]             |
| Diagne_VirusRes_2020                               | [39]             |
| Du_Life.scichina_2020                              | [40]             |
| Duarte_BrazilianJournalofMicrobiology_2021         | [41]             |
| Ergunay_ArchViroI_2017                             | [42]             |

|                                        |      |
|----------------------------------------|------|
| Ergunay_InfectGenetEvol_2016           | [43] |
| Ergünay_Parasites&Vectors_2017         | [44] |
| Evangelina_JInvertebrPathol_2013       | [45] |
| Faizah_Viruses_2020                    | [46] |
| Fan_ArchVirol_2016                     | [47] |
| Fang_ApplEnvironMicrobiol_2021         | [48] |
| Fang_FrontCellInfectMicrobiol_2021     | [49] |
| Fang_InfectDisPoverty_2018             | [50] |
| Fang_InfectiousDiseasesofPoverty_2021  | [51] |
| Farfan-Ale_AmJTropMedHyg_2009          | [52] |
| Farfan-Ale_VectorBorneZoonoticDis_2010 | [53] |
| Fauver_Virology_2016                   | [54] |
| Fernandes_ActaTrop_2016                | [55] |
| Fernandes_Viruses_2018                 | [56] |
| Ferreira_VirusGenes_2013               | [57] |
| Frey_EvolutionaryBioinformatics_2016   | [58] |
| Fujita_ArchVirol_2017                  | [59] |
| Garigliany_JGenVirol_2015              | [60] |
| Gil_MolEcolResour_2021                 | [61] |
| Gravina_Virology_2019                  | [62] |
| Grisenti_JGenVirol_2015                | [63] |
| Guarido_Viruses_2021                   | [64] |
| Guggemos_PLoSNeglTropDis_2021          | [65] |
| Guzman_AmJTropMedHyg_2018              | [66] |
| Hameed_FrontMicrobiol_2020             | [67] |
| Hameed_TransboundEmergDisease_2020     | [68] |
| Harrison_mSphere_2020                  | [69] |
| Harrison_Viruses_2016                  | [70] |
| He_ParasitVectors_2021                 | [71] |
| He_PLoSNeglTropDis_2021                | [72] |
| Hermanns_JGenVirol_2017                | [73] |
| Hermanns_JGenVirol_2020                | [74] |
| Hobson-Peters_PLoSOne_2013             | [75] |
| Hobson-Peters_Virology_2016            | [76] |
| Hoshino_Virology_2009                  | [77] |
| Huang_JInvertebrPathol_2015            | [78] |
| Huanyu_ViroJ_2012                      | [79] |
| Huhtamo_Virology_2012                  | [80] |
| Huhtamo_Virology_2014                  | [81] |
| Iwashita_TropMedHealth_2018            | [82] |
| Jeffries_WellcomeOpenRes_2020          | [83] |
| Kallies_Viruses_2014                   | [84] |
| Kawakami_ArchVirol_2016                | [85] |
| Kenney_JGenVirol_2014                  | [86] |
| Kim_Virology_2009                      | [87] |

|                                            |       |
|--------------------------------------------|-------|
| Klein_JMedEntomol_2021                     | [88]  |
| Kobayashi_JGenViroI_2017                   | [89]  |
| Kopp_Viruses_2019                          | [90]  |
| Kubacki_Viruses_2020                       | [91]  |
| Kuwata_ArchViroI_2013                      | [92]  |
| Kuwata_ArchViroI_2015                      | [93]  |
| KyawKyaw_VirusRes_2018                     | [94]  |
| LaraPinto_PloSOne_2017                     | [95]  |
| Liang_ArchViroI_2015                       | [96]  |
| Liu_BriefBioinform_2021                    | [97]  |
| Ma_PloSOne_2011                            | [98]  |
| Machado_Intervirol_2012                    | [99]  |
| Maia_Viruses_2019                          | [100] |
| Marklewitz_ProcNatIAcadSciUSA_2015         | [101] |
| Martin_ApplEnvironMicrobiol_2019           | [102] |
| Martin_Arch ViroI_2020                     | [103] |
| McLean_Virology_2015                       | [104] |
| Miranda_ViroI J_2019                       | [105] |
| Misencik_Vector Borne Zoonotic Dis_2016    | [106] |
| Moraes_Med Vet Entomol_2019                | [107] |
| Morais_Infect Genet Evol_2020              | [108] |
| Munivenkatappa_VectorBorneZoonoticDis_2021 | [109] |
| Muttis_ArchViroI_2012                      | [110] |
| Nabeshima_JGenViroI_2014                   | [111] |
| Nebbak_Viruses_2021                        | [112] |
| Newton_Viruses_2020                        | [113] |
| Ng_PLoSOne_2011                            | [114] |
| Obara-Nagoya_JMedEntomol_2013              | [115] |
| Obrien_EvolBioinformOnline_2017            | [116] |
| Obrien_Viruses_2020                        | [117] |
| Öhlund_Viruses_2019                        | [118] |
| Öncü_Infect Genet Evol_2018                | [119] |
| Orba_JGenViroI_2021                        | [120] |
| Papa_Arch ViroI_2016                       | [121] |
| Parreira_VirusRes_2012                     | [122] |
| Parry_Viruses_2020                         | [123] |
| Pettersson_Viruses_2019                    | [124] |
| Pyke_VirusEvol_2021                        | [125] |
| Ramírez_mSphere_2020                       | [126] |
| Ramos-Nino_PLoSOne_2020                    | [127] |
| Ramos-Nino2_PLoSOne_2020                   | [128] |
| Reuter_InfectGenetEvol_2016                | [129] |
| Ribeiro_Insects_2019                       | [130] |
| Ribeiro_Viruses_2019                       | [131] |
| Ribeiro_Viruses_2020                       | [132] |

|                                       |       |
|---------------------------------------|-------|
| Rizzo_ParasitVectors_2014             | [133] |
| Rwegoshora_JTropMed_2000              | [134] |
| Sadeghi_Virology_2018                 | [135] |
| Sadeghi_VirusRes_2017                 | [136] |
| Sanborn_MolEcol_2021                  | [137] |
| Sanborn_Viruses_2019                  | [138] |
| Scarpassa_BMCGenomics_2019            | [139] |
| Schuster_Jvirol_2014                  | [140] |
| Shahhosseini_InfectGenetEvol_2017     | [141] |
| Shi_JVirology_2017                    | [142] |
| Shi_Microbiome_2019                   | [143] |
| Shi_mSystems_2020                     | [144] |
| Shi_PLoSOne_2015                      | [145] |
| Silva_VirusRes_2019                   | [146] |
| Stanojevic_Viruses_2020               | [147] |
| Supriyono_JVetMedSci_2020             | [148] |
| Suvanto_ArchVirology_2020             | [149] |
| Takhampunya_JMedEntomol_2014          | [150] |
| Tangudu_JGenVirology_2019             | [151] |
| Tesh_Viruses_2020                     | [152] |
| Thannesberger_Pathogens_2020          | [153] |
| Thongsripong_SciRep_2021              | [154] |
| Tyler_AmJTropMedHyg_2011              | [155] |
| Vasilakis_Virology_2014               | [156] |
| Villinger_MolEcolResour_2017          | [157] |
| Wang_ArchVirology_2019                | [158] |
| Wang_mSphere_2021                     | [159] |
| Warrilow_PLoSOne_2018                 | [160] |
| Wastika_Viruses_2020                  | [161] |
| Williams_PLoSOne_2020                 | [162] |
| Williams_Viruses_2020                 | [163] |
| Xia_Virology_2018                     | [164] |
| Xiao_FrontCellInfectMicrobiol_2018    | [165] |
| Yamao_ArchVirology_2009               | [166] |
| Yezli_IntJEnvironResPublicHealth_2021 | [167] |
| Zakrzewski_SciRep_2018                | [168] |
| Zana_ActaVirology_2017                | [169] |
| Zhai_JGenVirology_2008                | [170] |
| Zhang_ArchVirology_2017               | [171] |
| Zhang_Virology_2018                   | [172] |
| Zhao_FrontMicrobiol_2019              | [173] |
| Zhao_SciTotalEnviron_2022             | [174] |
| Zuo_VirusRes_2014                     | [175] |

## References

1. Abílio, A.P., et al., *A survey of RNA viruses in mosquitoes from Mozambique reveals novel genetic lineages of flaviviruses and phenuiviruses, as well as frequent flavivirus-like viral DNA forms in *Mansonia**. BMC Microbiol, 2020. **20**(1): p. 225.
2. Ajamma, Y.U., et al., *Vertical transmission of naturally occurring Bunyamwera and insect-specific flavivirus infections in mosquitoes from islands and mainland shores of Lakes Victoria and Baringo in Kenya*. PLoS Negl Trop Dis, 2018. **12**(11): p. e0006949.
3. Ali, R., et al., *Characterization of the virome associated with *Haemagogus* mosquitoes in Trinidad, West Indies*. Sci Rep, 2021. **11**(1): p. 16584.
4. Atoni, E., et al., *Metagenomic Virome Analysis of *Culex* Mosquitoes from Kenya and China*. Viruses, 2018. **10**(1).
5. Auguste, A.J., et al., *Characterization of a novel Negevirus and a novel Bunyavirus isolated from *Culex* (*Culex*) *declarator* mosquitoes in Trinidad*. J Gen Virol, 2014. **95**(Pt 2): p. 481-485.
6. Auguste, A.J., et al., *Isolation of a novel insect-specific flavivirus with immunomodulatory effects in vertebrate systems*. Virology, 2021. **562**: p. 50-62.
7. Bahk, Y.Y., et al., *Monitoring Culicine Mosquitoes (Diptera: Culicidae) as a Vector of Flavivirus in Incheon Metropolitan City and Hwaseong-Si, Gyeonggi-Do, Korea, during 2019*. Korean J Parasitol, 2020. **58**(5): p. 551-558.
8. Baidaliuk, A., et al., *Novel genome sequences of cell-fusing agent virus allow comparison of virus phylogeny with the genetic structure of *Aedes aegypti* populations*. Virus Evol, 2020. **6**(1): p. veaa018.
9. Batson, J., et al., *Single mosquito metatranscriptomics identifies vectors, emerging pathogens and reservoirs in one assay*. Elife, 2021. **10**.
10. Belda, E., et al., *De novo profiling of RNA viruses in *Anopheles malaria* vector mosquitoes from forest ecological zones in Senegal and Cambodia*. BMC Genomics, 2019. **20**(1): p. 664.
11. Bennouna, A., et al., *Identification of Eilat virus and prevalence of infection among *Culex pipiens* L. populations, Morocco, 2016*. Virology, 2019. **530**: p. 85-88.
12. Bigot, D., et al., *Discovery of *Culex pipiens* associated tunisia virus: a new ssRNA(+) virus representing a new insect associated virus family*. Virus Evol, 2018. **4**(1): p. vex040.
13. Birnberg, L., et al., *Viromics on Honey-Baited FTA Cards as a New Tool for the Detection of Circulating Viruses in Mosquitoes*. Viruses, 2020. **12**(3).
14. Blitvich, B.J., et al., *Genomic sequence and phylogenetic analysis of *Culex flavivirus*, an insect-specific flavivirus, isolated from *Culex pipiens* (Diptera: Culicidae) in Iowa*. J Med Entomol, 2009. **46**(4): p. 934-41.
15. Bolling, B.G., et al., *Insect-specific flaviviruses from *Culex* mosquitoes in Colorado, with evidence of vertical transmission*. Am J Trop Med Hyg, 2011. **85**(1): p. 169-77.
16. Carissimo, G., et al., *Identification and Characterization of Two Novel RNA Viruses from *Anopheles gambiae* Species Complex Mosquitoes*. PLoS One, 2016. **11**(5): p. e0153881.
17. Carrera, J.P., et al., *Mercadeo Virus: A Novel Mosquito-Specific Flavivirus from Panama*. Am J Trop Med Hyg, 2015. **93**(5): p. 1014-9.
18. Chandler, J.A., R.M. Liu, and S.N. Bennett, *RNA shotgun metagenomic sequencing of northern California (USA) mosquitoes uncovers viruses, bacteria, and fungi*. Front Microbiol, 2015. **6**: p. 185.
19. Chandler, J.A., et al., *Metagenomic shotgun sequencing of a Bunyavirus in wild-caught *Aedes aegypti* from Thailand informs the evolutionary and genomic history of the Phleboviruses*. Virology, 2014. **464-465**: p. 312-319.
20. Charles, J., et al., *Detection of novel and recognized RNA viruses in mosquitoes from the Yucatan Peninsula of Mexico using metagenomics and characterization of their *in vitro* host ranges*. J Gen Virol, 2018. **99**(12): p. 1729-1738.

21. Chatterjee, S., et al., *Molecular detection and identification of Culex flavivirus in mosquito species from Jeju, Republic of Korea*. Virol J, 2021. **18**(1): p. 150.
22. Chen, Y.Y., et al., *First detection of the Africa/Caribbean/Latin American subtype of Culex flavivirus in Asian country, Taiwan*. Comp Immunol Microbiol Infect Dis, 2013. **36**(4): p. 387-96.
23. Chiuya, T., et al., *A survey of mosquito-borne and insect-specific viruses in hospitals and livestock markets in western Kenya*. PLoS One, 2021. **16**(5): p. e0252369.
24. Cholleti, H., et al., *Discovery of Novel Viruses in Mosquitoes from the Zambezi Valley of Mozambique*. PLoS One, 2016. **11**(9): p. e0162751.
25. Cholleti, H., et al., *Genetic characterization of a novel picorna-like virus in Culex spp. mosquitoes from Mozambique*. Virol J, 2018. **15**(1): p. 71.
26. Coffey, L.L., et al., *Enhanced arbovirus surveillance with deep sequencing: Identification of novel rhabdoviruses and bunyaviruses in Australian mosquitoes*. Virology, 2014. **448**: p. 146-58.
27. Contreras-Gutiérrez, M.A., et al., *Sinu virus, a novel and divergent orthomyxovirus related to members of the genus Thogotovirus isolated from mosquitoes in Colombia*. Virology, 2017. **501**: p. 166-175.
28. Cook, S., et al., *Novel virus discovery and genome reconstruction from field RNA samples reveals highly divergent viruses in dipteran hosts*. PLoS One, 2013. **8**(11): p. e80720.
29. Crabtree, M.B., P.T. Nga, and B.R. Miller, *Isolation and characterization of a new mosquito flavivirus, Quang Binh virus, from Vietnam*. Arch Virol, 2009. **154**(5): p. 857-60.
30. Cunha, M.S., et al., *Detection and characterization of Ilheus and Iguape virus genomes in historical mosquito samples from Southern Brazil*. Acta Trop, 2020. **205**: p. 105401.
31. Cunha, M.D.P., et al., *A Metagenomic Approach Identified a Novel Phasi Charoen-Like Virus Coinfecting a Chikungunya Virus-Infected Aedes aegypti Mosquito in Brazil*. Microbiol Resour Announc, 2020. **9**(31).
32. da Silva, A.F., et al., *Metatranscriptomic analysis identifies different viral-like sequences in two neotropical Mansoniini mosquito species*. Virus Res, 2021. **301**: p. 198455.
33. da Silva Ferreira, R., et al., *Insect-specific viruses and arboviruses in adult male culicids from Midwestern Brazil*. Infect Genet Evol, 2020. **85**: p. 104561.
34. da Silva Neves, N.A., et al., *Sialovirome of Brazilian tropical anophelines*. Virus Res, 2021. **302**: p. 198494.
35. da Silva Ribeiro, A.C., et al., *Negevirus isolated from mosquitoes in the Brazilian Amazon*. Virol J, 2022. **19**(1): p. 17.
36. Datta, S., et al., *Phylogenetic Characterization of a Novel Insect-Specific Flavivirus Detected in a Culex Pool, Collected from Assam, India*. Intervirology, 2015. **58**(3): p. 149-54.
37. de Araujo Coutinho, C.J., et al., *Occurrence and phylogenetic characterization of a baculovirus isolated from Culex quinquefasciatus in São Paulo State, Brazil*. Arch Virol, 2012. **157**(9): p. 1741-5.
38. de Oliveira Ribeiro, G., et al., *Guapiaçu virus, a new insect-specific flavivirus isolated from two species of Aedes mosquitoes from Brazil*. Sci Rep, 2021. **11**(1): p. 4674.
39. Diagne, M.M., et al., *Dianke virus: A new mesonivirus species isolated from mosquitoes in Eastern Senegal*. Virus Res, 2020. **275**: p. 197802.
40. Du, J., et al., *Characterization of viromes within mosquito species in China*. Sci China Life Sci, 2020. **63**(7): p. 1089-1092.
41. Duarte, M.A., et al., *Identification of potential new mosquito-associated viruses of adult Aedes aegypti mosquitoes from Tocantins state, Brazil*. Braz J Microbiol, 2021.
42. Ergünay, K., et al., *A novel rhabdovirus, related to Merida virus, in field-collected mosquitoes from Anatolia and Thrace*. Arch Virol, 2017. **162**(7): p. 1903-1911.

43. Ergünay, K., et al., *Isolation and genomic characterization of Culex theileri flaviviruses in field-collected mosquitoes from Turkey*. Infect Genet Evol, 2016. **46**: p. 138-147.
44. Ergünay, K., et al., *Co-circulation of West Nile virus and distinct insect-specific flaviviruses in Turkey*. Parasit Vectors, 2017. **10**(1): p. 149.
45. Evangelina, M., M.M. Victoria, and G.J. José, *Culex pipiens affected by joint infection of a mosquito iridescent virus and Strelkovimermis spiculatus*. J Invertebr Pathol, 2013. **114**(3): p. 295-7.
46. Faizah, A.N., et al., *Deciphering the Virome of Culex vishnui Subgroup Mosquitoes, the Major Vectors of Japanese Encephalitis, in Japan*. Viruses, 2020. **12**(3).
47. Fan, H., et al., *Complete genome sequence of Xishuangbanna flavivirus, a novel mosquito-specific flavivirus from China*. Arch Virol, 2016. **161**(6): p. 1723-7.
48. Fang, Y., et al., *Detection of DENV-2 and Insect-Specific Flaviviruses in Mosquitoes Collected From Jeddah, Saudi Arabia*. Front Cell Infect Microbiol, 2021. **11**: p. 626368.
49. Fang, Y., et al., *Monitoring Mosquito-Borne Arbovirus in Various Insect Regions in China in 2018*. Front Cell Infect Microbiol, 2021. **11**: p. 640993.
50. Fang, Y., et al., *Co-circulation of Aedes flavivirus, Culex flavivirus, and Quang Binh virus in Shanghai, China*. Infect Dis Poverty, 2018. **7**(1): p. 75.
51. Fang, Y., et al., *Molecular epidemiology of mosquito-borne viruses at the China-Myanmar border: discovery of a potential epidemic focus of Japanese encephalitis*. Infect Dis Poverty, 2021. **10**(1): p. 57.
52. Farfan-Ale, J.A., et al., *Detection of RNA from a novel West Nile-like virus and high prevalence of an insect-specific flavivirus in mosquitoes in the Yucatan Peninsula of Mexico*. Am J Trop Med Hyg, 2009. **80**(1): p. 85-95.
53. Farfan-Ale, J.A., et al., *Detection of flaviviruses and orthobunyaviruses in mosquitoes in the Yucatan Peninsula of Mexico in 2008*. Vector Borne Zoonotic Dis, 2010. **10**(8): p. 777-83.
54. Fauver, J.R., et al., *West African Anopheles gambiae mosquitoes harbor a taxonomically diverse virome including new insect-specific flaviviruses, mononegaviruses, and totiviruses*. Virology, 2016. **498**: p. 288-299.
55. Fernandes, L.N., et al., *Detection of Culex flavivirus and Aedes flavivirus nucleotide sequences in mosquitoes from parks in the city of São Paulo, Brazil*. Acta Trop, 2016. **157**: p. 73-83.
56. Fernandes, L.N., et al., *A Novel Highly Divergent Strain of Cell Fusing Agent Virus (CFAV) in Mosquitoes from the Brazilian Amazon Region*. Viruses, 2018. **10**(12).
57. Ferreira, D.D., et al., *Characterization of an insect-specific flavivirus (OCFVPT) co-isolated from Ochlerotatus caspius collected in southern Portugal along with a putative new Negev-like virus*. Virus Genes, 2013. **47**(3): p. 532-45.
58. Frey, K.G., et al., *Bioinformatic Characterization of Mosquito Viromes within the Eastern United States and Puerto Rico: Discovery of Novel Viruses*. Evol Bioinform Online, 2016. **12**(Suppl 2): p. 1-12.
59. Fujita, R., et al., *Bustos virus, a new member of the negevirus group isolated from a Mansonia mosquito in the Philippines*. Arch Virol, 2017. **162**(1): p. 79-88.
60. Garigliany, M.M., et al., *Characterization of a novel circo-like virus in Aedes vexans mosquitoes from Germany: evidence for a new genus within the family Circoviridae*. J Gen Virol, 2015. **96**(Pt 4): p. 915-920.
61. Gil, P., et al., *A library preparation optimized for metagenomics of RNA viruses*. Mol Ecol Resour, 2021. **21**(6): p. 1788-1807.
62. Gravina, H.D., et al., *Identification of insect-specific flaviviruses in areas of Brazil and Paraguay experiencing endemic arbovirus transmission and the description of a novel flavivirus infecting Sabethes belisarioi*. Virology, 2019. **527**: p. 98-106.
63. Grisenti, M., et al., *Wide detection of Aedes flavivirus in north-eastern Italy--a European hotspot of emerging mosquito-borne diseases*. J Gen Virol, 2015. **96**(Pt 2): p. 420-430.

64. Guarido, M.M., et al., *Detection of Insect-Specific Flaviviruses in Mosquitoes (Diptera: Culicidae) in Northeastern Regions of South Africa*. *Viruses*, 2021. **13**(11).
65. Guggemos, H.D., et al., *Simultaneous circulation of two West Nile virus lineage 2 clades and Bagaza virus in the Zambezi region, Namibia*. *PLoS Negl Trop Dis*, 2021. **15**(4): p. e0009311.
66. Guzman, H., et al., *Characterization of Three New Insect-Specific Flaviviruses: Their Relationship to the Mosquito-Borne Flavivirus Pathogens*. *Am J Trop Med Hyg*, 2018. **98**(2): p. 410-419.
67. Hameed, M., et al., *A Metagenomic Analysis of Mosquito Virome Collected From Different Animal Farms at Yunnan-Myanmar Border of China*. *Front Microbiol*, 2020. **11**: p. 591478.
68. Hameed, M., et al., *A viral metagenomic analysis reveals rich viral abundance and diversity in mosquitoes from pig farms*. *Transbound Emerg Dis*, 2020. **67**(1): p. 328-343.
69. Harrison, J.J., et al., *Antigenic Characterization of New Lineage II Insect-Specific Flaviviruses in Australian Mosquitoes and Identification of Host Restriction Factors*. *mSphere*, 2020. **5**(3).
70. Harrison, J.J., et al., *A New Orbivirus Isolated from Mosquitoes in North-Western Australia Shows Antigenic and Genetic Similarity to Corriparta Virus but Does Not Replicate in Vertebrate Cells*. *Viruses*, 2016. **8**(5).
71. He, W., et al., *Virome in adult Aedes albopictus captured during different seasons in Guangzhou City, China*. *Parasit Vectors*, 2021. **14**(1): p. 415.
72. He, X., et al., *Metagenomic sequencing reveals viral abundance and diversity in mosquitoes from the Shaanxi-Gansu-Ningxia region, China*. *PLoS Negl Trop Dis*, 2021. **15**(4): p. e0009381.
73. Hermanns, K., et al., *Discovery of a novel alphavirus related to Eilat virus*. *J Gen Virol*, 2017. **98**(1): p. 43-49.
74. Hermanns, K., et al., *Agua Salud alphavirus defines a novel lineage of insect-specific alphaviruses discovered in the New World*. *J Gen Virol*, 2020. **101**(1): p. 96-104.
75. Hobson-Peters, J., et al., *A new insect-specific flavivirus from northern Australia suppresses replication of West Nile virus and Murray Valley encephalitis virus in co-infected mosquito cells*. *PLoS One*, 2013. **8**(2): p. e56534.
76. Hobson-Peters, J., et al., *Discovery and characterisation of a new insect-specific bunyavirus from Culex mosquitoes captured in northern Australia*. *Virology*, 2016. **489**: p. 269-81.
77. Hoshino, K., et al., *Isolation and characterization of a new insect flavivirus from Aedes albopictus and Aedes flavopictus mosquitoes in Japan*. *Virology*, 2009. **391**(1): p. 119-29.
78. Huang, Y., et al., *Isolation and characterization of a novel invertebrate iridovirus from adult Anopheles minimus (AMIV) in China*. *J Invertebr Pathol*, 2015. **127**: p. 1-5.
79. Huanyu, W., et al., *Isolation and identification of a distinct strain of Culex Flavivirus from mosquitoes collected in Mainland China*. *Virol J*, 2012. **9**: p. 73.
80. Huhtamo, E., et al., *Novel insect-specific flavivirus isolated from northern Europe*. *Virology*, 2012. **433**(2): p. 471-8.
81. Huhtamo, E., et al., *Novel flaviviruses from mosquitoes: mosquito-specific evolutionary lineages within the phylogenetic group of mosquito-borne flaviviruses*. *Virology*, 2014. **464-465**: p. 320-329.
82. Iwashita, H., et al., *Mosquito arbovirus survey in selected areas of Kenya: detection of insect-specific virus*. *Trop Med Health*, 2018. **46**: p. 19.
83. Jeffries, C.L., et al., *Detection of Cell-Fusing Agent virus across ecologically diverse populations of Aedes aegypti on the Caribbean island of Saint Lucia*. *Wellcome Open Res*, 2020. **5**: p. 149.
84. Kallies, R., et al., *Genetic characterization of goutanap virus, a novel virus related to negeviruses, cileviruses and higreviruses*. *Viruses*, 2014. **6**(11): p. 4346-57.



85. Kawakami, K., et al., *Characterization of a novel negevirus isolated from Aedes larvae collected in a subarctic region of Japan*. Arch Virol, 2016. **161**(4): p. 801-9.
86. Kenney, J.L., et al., *Characterization of a novel insect-specific flavivirus from Brazil: potential for inhibition of infection of arthropod cells with medically important flaviviruses*. J Gen Virol, 2014. **95**(Pt 12): p. 2796-2808.
87. Kim, D.Y., et al., *Characterization of Culex Flavivirus (Flaviviridae) strains isolated from mosquitoes in the United States and Trinidad*. Virology, 2009. **386**(1): p. 154-9.
88. Klein, A., et al., *Screening for Viruses and Lemur-Associated Filara in Wild-Caught Mosquitoes From Madagascar*. J Med Entomol, 2021. **58**(2): p. 983-989.
89. Kobayashi, D., et al., *Isolation and characterization of a new iflavirus from Armigeres spp. mosquitoes in the Philippines*. J Gen Virol, 2017. **98**(11): p. 2876-2881.
90. Kopp, A., et al., *Detection of Two Highly Diverse Peribunyaviruses in Mosquitoes from Palenque, Mexico*. Viruses, 2019. **11**(9).
91. Kubacki, J., et al., *Viral Metagenomic Analysis of Aedes albopictus Mosquitos from Southern Switzerland*. Viruses, 2020. **12**(9).
92. Kuwata, R., et al., *Characterization of Dak Nong virus, an insect nidovirus isolated from Culex mosquitoes in Vietnam*. Arch Virol, 2013. **158**(11): p. 2273-84.
93. Kuwata, R., et al., *Analysis of Mosquito-Borne Flavivirus Superinfection in Culex tritaeniorhynchus (Diptera: Culicidae) Cells Persistently Infected with Culex Flavivirus (Flaviviridae)*. J Med Entomol, 2015. **52**(2): p. 222-9.
94. Kyaw Kyaw, A., et al., *Isolation and genomic characterization of Culex flaviviruses from mosquitoes in Myanmar*. Virus Res, 2018. **247**: p. 120-124.
95. Lara Pinto, A.Z., et al., *Novel viruses in salivary glands of mosquitoes from sylvatic Cerrado, Midwestern Brazil*. PLoS One, 2017. **12**(11): p. e0187429.
96. Liang, W., et al., *Distribution and phylogenetic analysis of Culex flavivirus in mosquitoes in China*. Arch Virol, 2015. **160**(9): p. 2259-68.
97. Liu, L., et al., *Comparative viromes of Culicoides and mosquitoes reveal their consistency and diversity in viral profiles*. Brief Bioinform, 2021. **22**(4).
98. Ma, M., et al., *Discovery of DNA viruses in wild-caught mosquitoes using small RNA high throughput sequencing*. PLoS One, 2011. **6**(9): p. e24758.
99. Machado, D.C., et al., *First identification of Culex flavivirus (Flaviviridae) in Brazil*. Intervirology, 2012. **55**(6): p. 475-83.
100. Maia, L.M.S., et al., *Novel Viruses in Mosquitoes from Brazilian Pantanal*. Viruses, 2019. **11**(10).
101. Marklewitz, M., et al., *Evolutionary and phenotypic analysis of live virus isolates suggests arthropod origin of a pathogenic RNA virus family*. Proc Natl Acad Sci U S A, 2015. **112**(24): p. 7536-41.
102. Martin, E., et al., *Mosquito-Borne Viruses and Insect-Specific Viruses Revealed in Field-Collected Mosquitoes by a Monitoring Tool Adapted from a Microbial Detection Array*. Appl Environ Microbiol, 2019. **85**(19).
103. Martin, E., et al., *Cell fusing agent virus (Flavivirus) infection in Aedes aegypti in Texas: seasonality, comparison by trap type, and individual viral loads*. Arch Virol, 2020. **165**(8): p. 1769-1776.
104. McLean, B.J., et al., *Differential suppression of persistent insect specific viruses in trans-infected wMel and wMelPop-CLA Aedes-derived mosquito lines*. Virology, 2019. **527**: p. 141-145.
105. Miranda, J., et al., *First report of Culex flavivirus infection from Culex coronator (Diptera: Culicidae), Colombia*. Virol J, 2019. **16**(1): p. 1.
106. Misencik, M.J., et al., *Isolation of a Novel Insect-Specific Flavivirus from Culiseta melanura in the Northeastern United States*. Vector Borne Zoonotic Dis, 2016. **16**(3): p. 181-90.
107. Moraes, O.S., et al., *Natural infection by Culex flavivirus in Culex quinquefasciatus mosquitoes captured in Cuiabá, Mato Grosso Mid-Western Brazil*. Med Vet Entomol, 2019. **33**(3): p. 397-406.

108. Morais, P., et al., *Insect-specific flaviviruses and densovirus, suggested to have been transmitted vertically, found in mosquitoes collected in Angola: Genome detection and phylogenetic characterization of viral sequences*. *Infect Genet Evol*, 2020. **80**: p. 104191.
109. Munivenkatappa, A., et al., *Identification of Phasi Charoen-Like Phasivirus in Field Collected Aedes aegypti from Karnataka State, India*. *Vector Borne Zoonotic Dis*, 2021. **21**(11): p. 900-909.
110. Muttis, E., et al., *First record of a mosquito iridescent virus in Culex pipiens L. (Diptera: Culicidae)*. *Arch Virol*, 2012. **157**(8): p. 1569-71.
111. Nabeshima, T., et al., *Tanay virus, a new species of virus isolated from mosquitoes in the Philippines*. *J Gen Virol*, 2014. **95**(Pt 6): p. 1390-1395.
112. Nebbak, A., et al., *Virome Diversity among Mosquito Populations in a Sub-Urban Region of Marseille, France*. *Viruses*, 2021. **13**(5).
113. Newton, N.D., et al., *Genetic, Morphological and Antigenic Relationships between Mesonivirus Isolates from Australian Mosquitoes and Evidence for Their Horizontal Transmission*. *Viruses*, 2020. **12**(10).
114. Ng, T.F., et al., *Broad surveys of DNA viral diversity obtained through viral metagenomics of mosquitoes*. *PLoS One*, 2011. **6**(6): p. e20579.
115. Obara-Nagoya, M., et al., *Ecological and genetic analyses of the complete genomes of Culex flavivirus strains isolated from Culex tritaeniorhynchus and Culex pipiens (Diptera: Culicidae) group mosquitoes*. *J Med Entomol*, 2013. **50**(2): p. 300-9.
116. O'Brien, C.A., et al., *Discovery and Characterisation of Castlereia Virus, a New Species of Negevirus Isolated in Australia*. *Evol Bioinform Online*, 2017. **13**: p. 1176934317691269.
117. O'Brien, C.A., et al., *A Unique Relative of Rotifer Birnavirus Isolated from Australian Mosquitoes*. *Viruses*, 2020. **12**(9).
118. Öhlund, P., et al., *Viromics Reveal a Number of Novel RNA Viruses in Swedish Mosquitoes*. *Viruses*, 2019. **11**(11).
119. Öncü, C., et al., *West Nile virus, Anopheles flavivirus, a novel flavivirus as well as Merida-like rhabdovirus Turkey in field-collected mosquitoes from Thrace and Anatolia*. *Infect Genet Evol*, 2018. **57**: p. 36-45.
120. Orba, Y., et al., *Diverse mosquito-specific flaviviruses in the Bolivian Amazon basin*. *J Gen Virol*, 2021. **102**(3).
121. Papa, A., et al., *Insect-specific flaviviruses in Aedes mosquitoes in Greece*. *Arch Virol*, 2016. **161**(8): p. 2183-8.
122. Parreira, R., et al., *Genetic characterization of an insect-specific flavivirus isolated from Culex theileri mosquitoes collected in southern Portugal*. *Virus Res*, 2012. **167**(2): p. 152-61.
123. Parry, R., et al., *Identification and RNAi Profile of a Novel Iflavirus Infecting Senegalese Aedes vexans arabiensis Mosquitoes*. *Viruses*, 2020. **12**(4).
124. Pettersson, J.H., et al., *Meta-Transcriptomic Comparison of the RNA Viromes of the Mosquito Vectors Culex pipiens and Culex torrentium in Northern Europe*. *Viruses*, 2019. **11**(11).
125. Pyke, A.T., et al., *Uncovering the genetic diversity within the Aedes notoscriptus virome and isolation of new viruses from this highly urbanised and invasive mosquito*. *Virus Evol*, 2021. **7**(2): p. veab082.
126. Ramírez, A.L., et al., *Metagenomic Analysis of the Virome of Mosquito Excreta*. *mSphere*, 2020. **5**(5).
127. Ramos-Nino, M.E., et al., *High prevalence of Phasi Charoen-like virus from wild-caught Aedes aegypti in Grenada, W.I. as revealed by metagenomic analysis*. *PLoS One*, 2020. **15**(1): p. e0227998.
128. Ramos-Nino, M.E., et al., *Metagenomic analysis of Aedes aegypti and Culex quinquefasciatus mosquitoes from Grenada, West Indies*. *PLoS One*, 2020. **15**(4): p. e0231047.

129. Reuter, G., et al., *Detection and genome analysis of a novel (dima)rhabdovirus (Riverside virus) from Ochlerotatus sp. mosquitoes in Central Europe*. *Infect Genet Evol*, 2016. **39**: p. 336-341.
130. Ribeiro, M.S., et al., *High Prevalence of a Newly Discovered Wutai Mosquito Phasivirus in Mosquitoes from Rio de Janeiro, Brazil*. *Insects*, 2019. **10**(5).
131. Ribeiro, G.O., et al., *Detection of RNA-Dependent RNA Polymerase of Hubei Reo-Like Virus 7 by Next-Generation Sequencing in Aedes aegypti and Culex quinquefasciatus Mosquitoes from Brazil*. *Viruses*, 2019. **11**(2).
132. Ribeiro, G.O., et al., *Aedes aegypti from Amazon Basin Harbor High Diversity of Novel Viral Species*. *Viruses*, 2020. **12**(8).
133. Rizzo, F., et al., *Molecular characterization of flaviviruses from field-collected mosquitoes in northwestern Italy, 2011-2012*. *Parasit Vectors*, 2014. **7**: p. 395.
134. Rwegoshora, R.T., K.J. Baisley, and P. Kittayapong, *Seasonal and spatial variation in natural dengue virus infection in Anopheles minimus S.L. in Thailand*. *Southeast Asian J Trop Med Public Health*, 2000. **31**(1): p. 3-9.
135. Sadeghi, M., et al., *Virome of > 12 thousand Culex mosquitoes from throughout California*. *Virology*, 2018. **523**: p. 74-88.
136. Sadeghi, M., et al., *Genomes of viral isolates derived from different mosquito species*. *Virus Res*, 2017. **242**: p. 49-57.
137. Sanborn, M.A., et al., *Metagenomic analysis reveals Culex mosquito virome diversity and Japanese encephalitis genotype V in the Republic of Korea*. *Mol Ecol*, 2021. **30**(21): p. 5470-5487.
138. Sanborn, M.A., et al., *Metagenomic Analysis Reveals Three Novel and Prevalent Mosquito Viruses from a Single Pool of Aedes vexans nipponii Collected in the Republic of Korea*. *Viruses*, 2019. **11**(3).
139. Scarpassa, V.M., et al., *An insight into the sialotranscriptome and virome of Amazonian anophelines*. *BMC Genomics*, 2019. **20**(1): p. 166.
140. Schuster, S., et al., *A unique nodavirus with novel features: mosinovirus expresses two subgenomic RNAs, a capsid gene of unknown origin, and a suppressor of the antiviral RNA interference pathway*. *J Virol*, 2014. **88**(22): p. 13447-59.
141. Shahhosseini, N., et al., *Detection and characterization of a novel rhabdovirus in Aedes cantans mosquitoes and evidence for a mosquito-associated new genus in the family Rhabdoviridae*. *Infect Genet Evol*, 2017. **55**: p. 260-268.
142. Shi, M., et al., *High-Resolution Metatranscriptomics Reveals the Ecological Dynamics of Mosquito-Associated RNA Viruses in Western Australia*. *J Virol*, 2017. **91**(17).
143. Shi, C., et al., *Stable distinct core eukaryotic viromes in different mosquito species from Guadeloupe, using single mosquito viral metagenomics*. *Microbiome*, 2019. **7**(1): p. 121.
144. Shi, C., et al., *Stability of the Virome in Lab- and Field-Collected Aedes albopictus Mosquitoes across Different Developmental Stages and Possible Core Viruses in the Publicly Available Virome Data of Aedes Mosquitoes*. *mSystems*, 2020. **5**(5).
145. Shi, C., et al., *A metagenomic survey of viral abundance and diversity in mosquitoes from Hubei province*. *PLoS One*, 2015. **10**(6): p. e0129845.
146. Silva, M., et al., *A diverse assemblage of RNA and DNA viruses found in mosquitoes collected in southern Portugal*. *Virus Res*, 2019. **274**: p. 197769.
147. Stanojević, M., et al., *Depicting the RNA Virome of Hematophagous Arthropods from Belgrade, Serbia*. *Viruses*, 2020. **12**(9).
148. Supriyono, et al., *Mosquito-borne viruses, insect-specific flaviviruses (family Flaviviridae, genus Flavivirus), Banna virus (family Reoviridae, genus Seadornavirus), Bogor virus (unassigned member of family Permutotetraviridae), and alphamesoniviruses 2 and 3 (family Mesoniviridae, genus Alphamesonivirus) isolated from Indonesian mosquitoes*. *J Vet Med Sci*, 2020. **82**(7): p. 1030-1041.
149. Suvanto, M.T., et al., *A novel negevirus isolated from Aedes vexans mosquitoes in Finland*. *Arch Virol*, 2020. **165**(12): p. 2989-2992.

150. Takhampunya, R., et al., *Distribution and mosquito hosts of Chaoyang virus, a newly reported flavivirus from the Republic of Korea, 2008-2011*. J Med Entomol, 2014. **51**(2): p. 464-74.
151. Tangudu, C.S., et al., *Skunk River virus, a novel orbivirus isolated from Aedes trivittatus in the United States*. J Gen Virol, 2019. **100**(2): p. 295-300.
152. Tesh, R.B., et al., *Characterization of Port Bolivar Virus, a Novel Entomobirnavirus (Birnaviridae) Isolated from Mosquitoes Collected in East Texas, USA*. Viruses, 2020. **12**(4).
153. Thannesberger, J., et al., *Highly Sensitive Virome Characterization of Aedes aegypti and Culex pipiens Complex from Central Europe and the Caribbean Reveals Potential for Interspecies Viral Transmission*. Pathogens, 2020. **9**(9).
154. Thongsripong, P., et al., *Metagenomic shotgun sequencing reveals host species as an important driver of virome composition in mosquitoes*. Sci Rep, 2021. **11**(1): p. 8448.
155. Tyler, S., et al., *Distribution and phylogenetic comparisons of a novel mosquito flavivirus sequence present in Culex tarsalis Mosquitoes from western Canada with viruses isolated in California and Colorado*. Am J Trop Med Hyg, 2011. **85**(1): p. 162-8.
156. Vasilakis, N., et al., *Mesoniviruses are mosquito-specific viruses with extensive geographic distribution and host range*. Virol J, 2014. **11**: p. 97.
157. Villinger, J., et al., *Arbovirus and insect-specific virus discovery in Kenya by novel six genera multiplex high-resolution melting analysis*. Mol Ecol Resour, 2017. **17**(3): p. 466-480.
158. Wang, Y., et al., *Complete genome sequence of a novel negevirus isolated from Culex tritaeniorhynchus in China*. Arch Virol, 2019. **164**(3): p. 907-911.
159. Wang, L., et al., *Establishment of Culex modestus in Belgium and a Glance into the Virome of Belgian Mosquito Species*. mSphere, 2021. **6**(2).
160. Warrilow, D., et al., *The taxonomy of an Australian nodavirus isolated from mosquitoes*. PLoS One, 2018. **13**(12): p. e0210029.
161. Wastika, C.E., et al., *Discoveries of Exoribonuclease-Resistant Structures of Insect-Specific Flaviviruses Isolated in Zambia*. Viruses, 2020. **12**(9).
162. Williams, S.H., et al., *Discovery of Jogalong virus, a novel hepacivirus identified in a Culex annulirostris (Skuse) mosquito from the Kimberley region of Western Australia*. PLoS One, 2020. **15**(1): p. e0227114.
163. Williams, S.H., et al., *The Diversity and Distribution of Viruses Associated with Culex annulirostris Mosquitoes from the Kimberley Region of Western Australia*. Viruses, 2020. **12**(7).
164. Xia, H., et al., *Comparative Metagenomic Profiling of Viromes Associated with Four Common Mosquito Species in China*. Virol Sin, 2018. **33**(1): p. 59-66.
165. Xiao, P., et al., *Metagenomic Sequencing From Mosquitoes in China Reveals a Variety of Insect and Human Viruses*. Front Cell Infect Microbiol, 2018. **8**: p. 364.
166. Yamao, T., et al., *Novel virus discovery in field-collected mosquito larvae using an improved system for rapid determination of viral RNA sequences (RDV ver4.0)*. Arch Virol, 2009. **154**(1): p. 153-8.
167. Yezli, S., et al., *Lack of Zika Virus and Other Recognized Flaviviruses among the Mosquito Vectors during and Post the Hajj Mass Gathering*. Int J Environ Res Public Health, 2021. **18**(12).
168. Zakrzewski, M., et al., *Mapping the virome in wild-caught Aedes aegypti from Cairns and Bangkok*. Sci Rep, 2018. **8**(1): p. 4690.
169. Zana, B., et al., *Molecular traces of a putative novel insect flavivirus from Anopheles hyrcanus mosquito species in Hungary*. Acta Virol, 2017. **61**(1): p. 127-129.
170. Zhai, Y.G., et al., *Isolation and characterization of the full coding sequence of a novel densovirus from the mosquito Culex pipiens pallens*. J Gen Virol, 2008. **89**(Pt 1): p. 195-199.

171. Zhang, G., et al., *Cell fusing agent virus and dengue virus mutually interact in Aedes aegypti cell lines*. Sci Rep, 2017. **7**(1): p. 6935.
172. Zhang, X., et al., *Discovery and high prevalence of Phasi Charoen-like virus in field-captured Aedes aegypti in South China*. Virology, 2018. **523**: p. 35-40.
173. Zhao, L., et al., *Characterization of a Novel Tanay Virus Isolated From Anopheles sinensis Mosquitoes in Yunnan, China*. Front Microbiol, 2019. **10**: p. 1963.
174. Zhao, M., et al., *Viral metagenomics unveiled extensive communications of viruses within giant pandas and their associated organisms in the same ecosystem*. Sci Total Environ, 2022: p. 153317.
175. Zuo, S., et al., *Detection of Quang Binh virus from mosquitoes in China*. Virus Res, 2014. **180**: p. 31-8.
