# Supplementary material for: Composition and global distribution of the mosquito virome - A comprehensive database of insect-specific viruses
Source: PubMed Central journal article supplement (PMC9929601; doi:10.1016/j.onehlt.2023.100490), 2023-01-20
Supplement: mmc3.pdf [file mmc3.pdf]

**Supplementary Table S2.** Virus positive mosquito species, with the corresponding number of continents, countries and studies in which they are sampled.

| <b>Genus</b>     | <b>Species</b> | <b>Continents</b> | <b>Countries</b> | <b>Studies</b> |
|------------------|----------------|-------------------|------------------|----------------|
| <b>Aedeomyia</b> | catasticta     | 1                 | 1                | 1              |
| <b>Aedes</b>     | aegypti        | 5                 | 17               | 31             |
|                  | alboannulatus  | 1                 | 1                | 3              |
|                  | albopictus     | 4                 | 10               | 19             |
|                  | annulipes      | 2                 | 2                | 2              |
|                  | atlanticus     | 1                 | 1                | 1              |
|                  | bekkui         | 1                 | 1                | 1              |
|                  | berlandi       | 1                 | 1                | 1              |
|                  | caballus       | 1                 | 1                | 1              |
|                  | camptorhynchus | 1                 | 1                | 3              |
|                  | cantans        | 1                 | 2                | 2              |
|                  | caspius        | 2                 | 4                | 6              |
|                  | cinereus       | 1                 | 1                | 1              |
|                  | clelandi       | 1                 | 1                | 1              |
|                  | communis       | 1                 | 1                | 1              |
|                  | cumminsii      | 1                 | 1                | 1              |
|                  | detritus       | 1                 | 1                | 1              |
|                  | dorsalis       | 2                 | 2                | 2              |
|                  | flavescens     | 1                 | 1                | 1              |
|                  | flavidorsalis  | 1                 | 1                | 1              |
|                  | flavopictus    | 1                 | 1                | 1              |
|                  | fowleri        | 1                 | 1                | 1              |
|                  | fucifer        | 1                 | 1                | 1              |
|                  | hesperonotius  | 1                 | 1                | 2              |
|                  | luteocephalus  | 1                 | 1                | 1              |
|                  | mcintoshii     | 1                 | 1                | 1              |
|                  | minutus        | 1                 | 1                | 1              |
|                  | normanensis    | 1                 | 1                | 3              |
|                  | notoscriptus   | 1                 | 1                | 3              |
|                  | procax         | 1                 | 1                | 1              |
|                  | scapularis     | 1                 | 4                | 5              |
|                  | sollicitans    | 1                 | 1                | 1              |
|                  | sudanensis     | 1                 | 1                | 1              |
|                  | taeniorhynchus | 1                 | 1                | 3              |
| terrens          | 1              | 1                 | 1                |                |
| treplicates      | 1              | 1                 | 1                |                |
| tricholabis      | 1              | 1                 | 1                |                |
| triseriatus      | 1              | 1                 | 1                |                |
| trivittatus      | 1              | 1                 | 1                |                |
| turneri          | 1              | 1                 | 1                |                |
| unknown          | 5              | 8                 | 11               |                |
| vexans           | 4              | 7                 | 9                |                |

|                       |                  |   |   |    |
|-----------------------|------------------|---|---|----|
|                       | vigilax          | 1 | 1 | 4  |
|                       | vittatus         | 1 | 1 | 1  |
| <b>Anopheles</b>      | amictus          | 1 | 1 | 1  |
|                       | annulipes        | 1 | 1 | 2  |
|                       | coluzzii         | 1 | 1 | 1  |
|                       | coustani         | 1 | 2 | 2  |
|                       | crucians         | 1 | 1 | 1  |
|                       | cruzii           | 1 | 1 | 1  |
|                       | darlingi         | 1 | 1 | 1  |
|                       | funestus         | 1 | 1 | 1  |
|                       | gambiae          | 1 | 4 | 5  |
|                       | hyrcanus         | 1 | 1 | 1  |
|                       | maculipalpis     | 1 | 1 | 1  |
|                       | maculipennis     | 1 | 1 | 1  |
|                       | marajoara        | 1 | 1 | 1  |
|                       | minimus          | 1 | 2 | 2  |
|                       | pharoensis       | 1 | 1 | 1  |
|                       | pretoriensis     | 1 | 1 | 1  |
|                       | rufipes          | 1 | 1 | 1  |
|                       | sinensis         | 1 | 1 | 9  |
|                       | squamosus        | 1 | 2 | 2  |
|                       | stephensi        | 1 | 1 | 1  |
|                       | tessellatus      | 1 | 1 | 1  |
|                       | triannulatus     | 1 | 1 | 2  |
|                       | unknown          | 4 | 9 | 8  |
| vagus                 | 1                | 1 | 1 |    |
| <b>Armigeres</b>      | obturbans        | 1 | 1 | 1  |
|                       | subalbatus       | 1 | 4 | 5  |
|                       | unknown          | 1 | 1 | 2  |
| <b>Coquillettidia</b> | fuscopennata     | 1 | 1 | 1  |
|                       | juxtamansonia    | 1 | 1 | 1  |
|                       | metallica        | 1 | 2 | 2  |
|                       | richiardii       | 1 | 1 | 1  |
|                       | xanthogaster     | 1 | 1 | 3  |
| <b>Culex</b>          | annulirostris    | 2 | 2 | 11 |
|                       | antennatus       | 1 | 3 | 3  |
|                       | australicus      | 1 | 1 | 3  |
|                       | bitaeniorhynchus | 1 | 1 | 1  |
|                       | chidesteri       | 1 | 1 | 1  |
|                       | coronator        | 1 | 3 | 3  |
|                       | decens           | 1 | 2 | 2  |
|                       | declarator       | 2 | 3 | 3  |
|                       | erythrothorax    | 1 | 1 | 2  |
|                       | fatigans         | 1 | 1 | 1  |
|                       | fuscocephala     | 1 | 3 | 4  |

|                     |                   |   |    |    |
|---------------------|-------------------|---|----|----|
|                     | globocoxitus      | 1 | 1  | 3  |
|                     | inatomii          | 1 | 2  | 2  |
|                     | laticinctus       | 1 | 1  | 1  |
|                     | modestus          | 2 | 2  | 2  |
|                     | neavei            | 1 | 1  | 1  |
|                     | nebulosus         | 1 | 3  | 4  |
|                     | nigripalpus       | 2 | 3  | 3  |
|                     | orientalis        | 1 | 1  | 1  |
|                     | pipiens           | 5 | 18 | 34 |
|                     | poecilipes        | 1 | 1  | 1  |
|                     | pseudovishnui     | 1 | 2  | 2  |
|                     | pullus            | 1 | 1  | 2  |
|                     | quinquefasciatus  | 5 | 16 | 29 |
|                     | restuans          | 1 | 1  | 1  |
|                     | sitiens           | 2 | 2  | 4  |
|                     | tarsalis          | 1 | 2  | 5  |
|                     | theileri          | 1 | 2  | 3  |
|                     | torrentium        | 1 | 1  | 2  |
|                     | tritaeniorhynchus | 2 | 8  | 23 |
|                     | univittatus       | 1 | 3  | 3  |
|                     | unknown           | 6 | 16 | 30 |
|                     | vagans            | 1 | 2  | 2  |
|                     | vishnui           | 1 | 3  | 4  |
| <b>Culiseta</b>     | annulata          | 1 | 2  | 2  |
|                     | atra              | 1 | 1  | 1  |
|                     | incidens          | 1 | 1  | 1  |
|                     | longiareolata     | 1 | 2  | 2  |
|                     | melanura          | 1 | 1  | 1  |
|                     | unknown           | 1 | 1  | 1  |
| <b>Heamagogus</b>   | janthinomys       | 1 | 1  | 1  |
| <b>Mansonia</b>     | africana          | 1 | 4  | 4  |
|                     | titillans         | 1 | 1  | 1  |
|                     | uniformis         | 3 | 6  | 6  |
|                     | unknown           | 3 | 3  | 4  |
|                     | wilsoni           | 1 | 1  | 2  |
| <b>Ochlerotatus</b> | fulvus            | 1 | 1  | 1  |
|                     | koreicus          | 1 | 1  | 1  |
|                     | sierrensis        | 1 | 1  | 1  |
|                     | unknown           | 1 | 2  | 2  |
| <b>Psorophora</b>   | albigenu          | 1 | 2  | 2  |
|                     | albipes           | 1 | 1  | 1  |
|                     | ciliate           | 1 | 1  | 1  |
|                     | columbiae         | 1 | 1  | 1  |
|                     | ferox             | 1 | 1  | 1  |
|                     | unknown           | 1 | 1  | 1  |

|                    |              |   |    |    |
|--------------------|--------------|---|----|----|
| <b>Sabethes</b>    | belisarioi   | 1 | 1  | 1  |
|                    | gymonothorax | 1 | 1  | 1  |
| <b>Unknown</b>     | unknown      | 6 | 15 | 24 |
| <b>Uranotaenia</b> | unguiculata  | 1 | 1  | 2  |
|                    | unknown      | 1 | 1  | 1  |
| <b>Wyeomyia</b>    | complosa     | 1 | 1  | 1  |
