# Supplementary material for: Composition and global distribution of the mosquito virome - A comprehensive database of insect-specific viruses
Source: PubMed Central journal article supplement (PMC9929601; doi:10.1016/j.onehlt.2023.100490), 2023-01-20

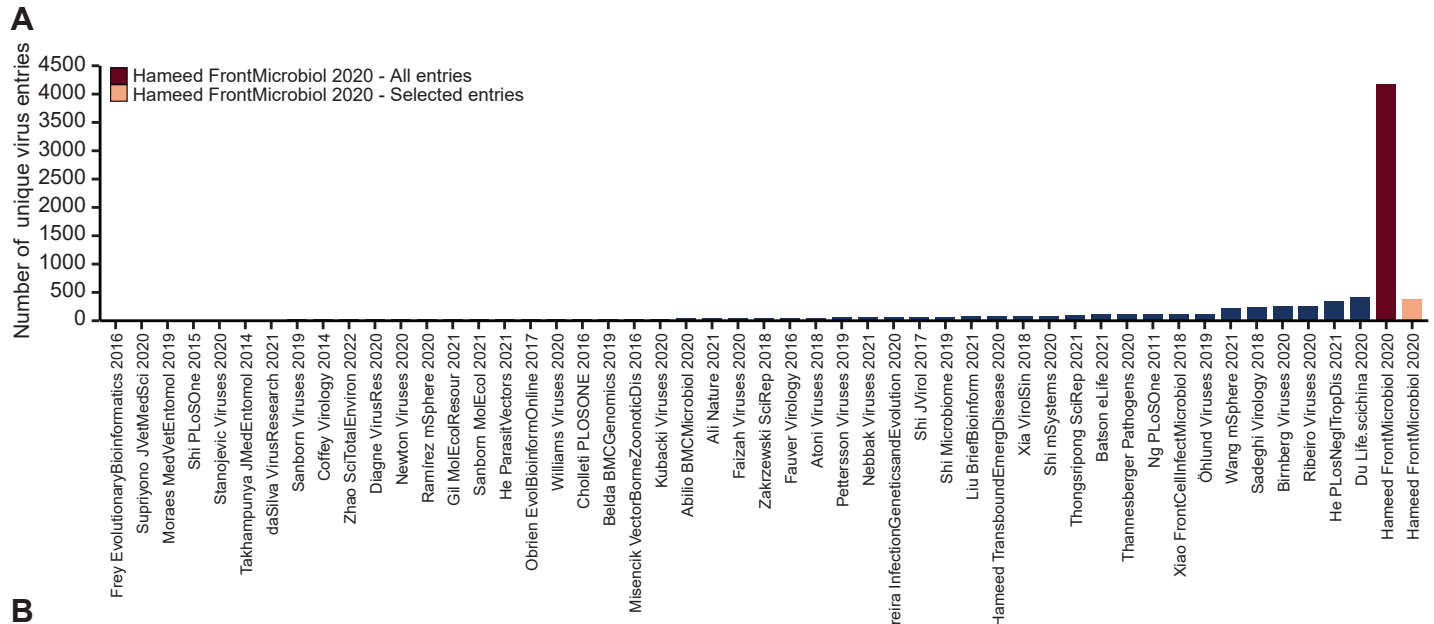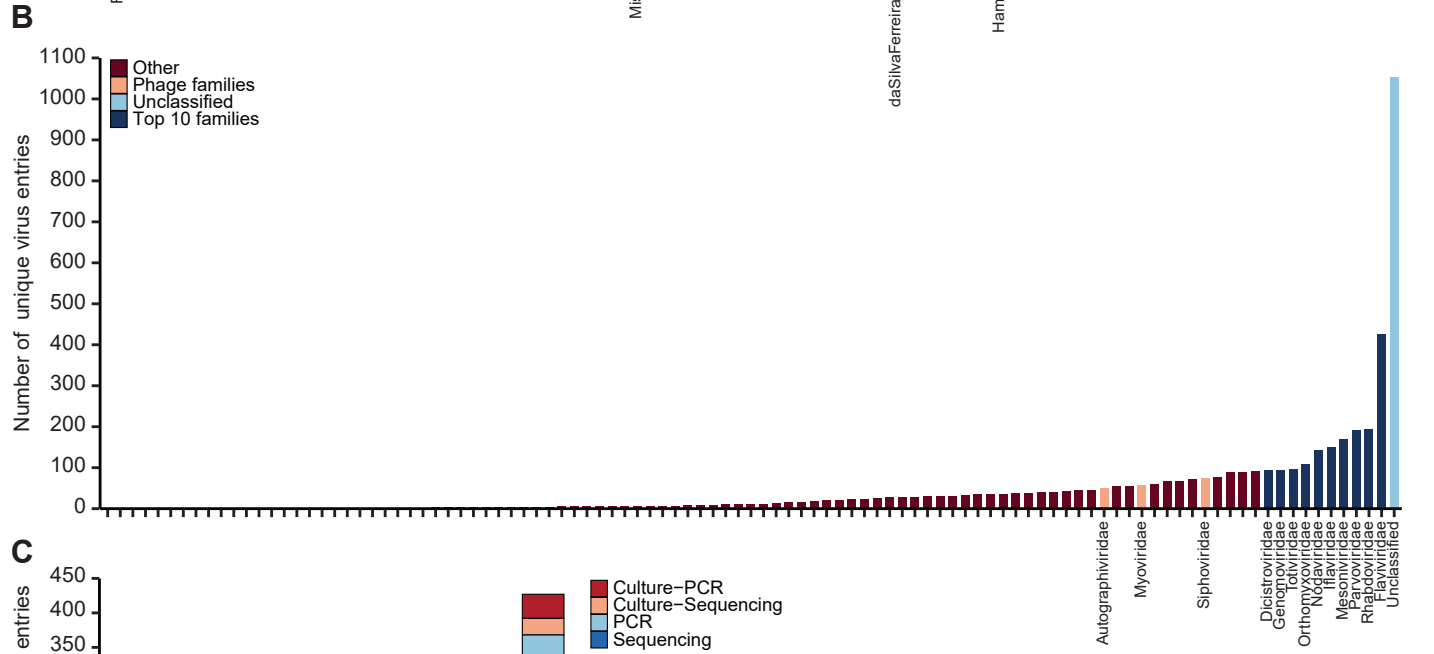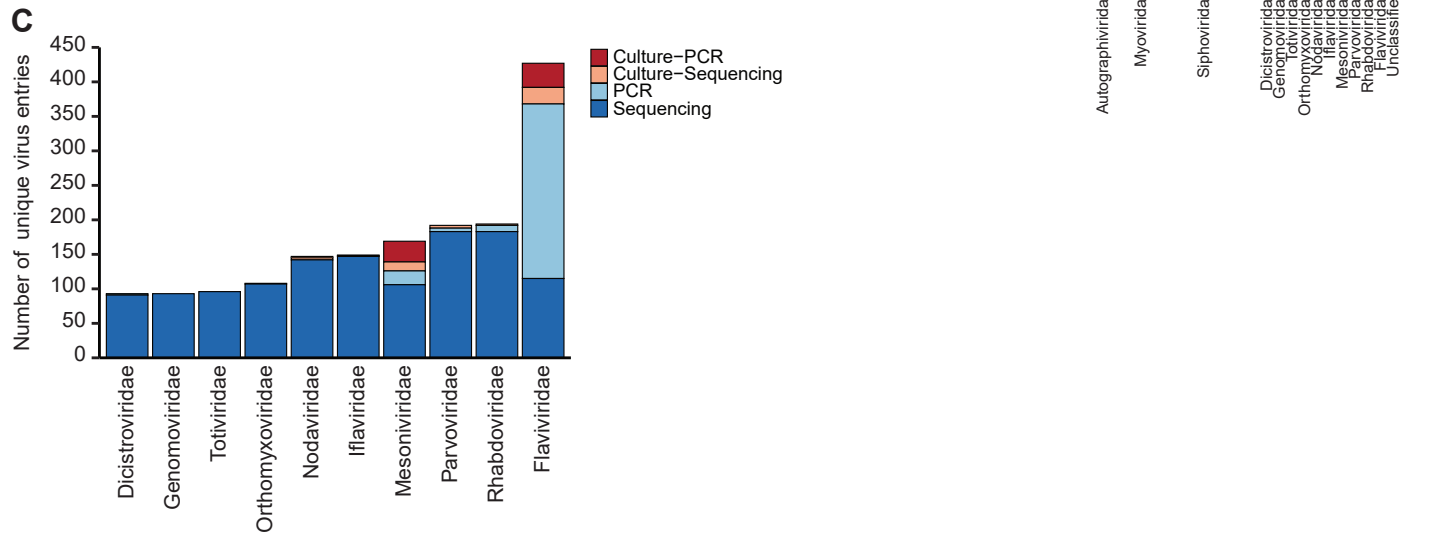

Supplement: mmc4.pdf [file mmc4.pdf]
